# Supplementary material for: Homologous recombination repair rathway and RAD54L in early-stage lung adenocarcinoma
Source: PeerJ journal article supplement (doi:10.7717/peerj.10680), 2021-02-16
Supplement: supplementary_1.pdf [file supplementary_1.pdf]

**A**

KM plot-LUAD

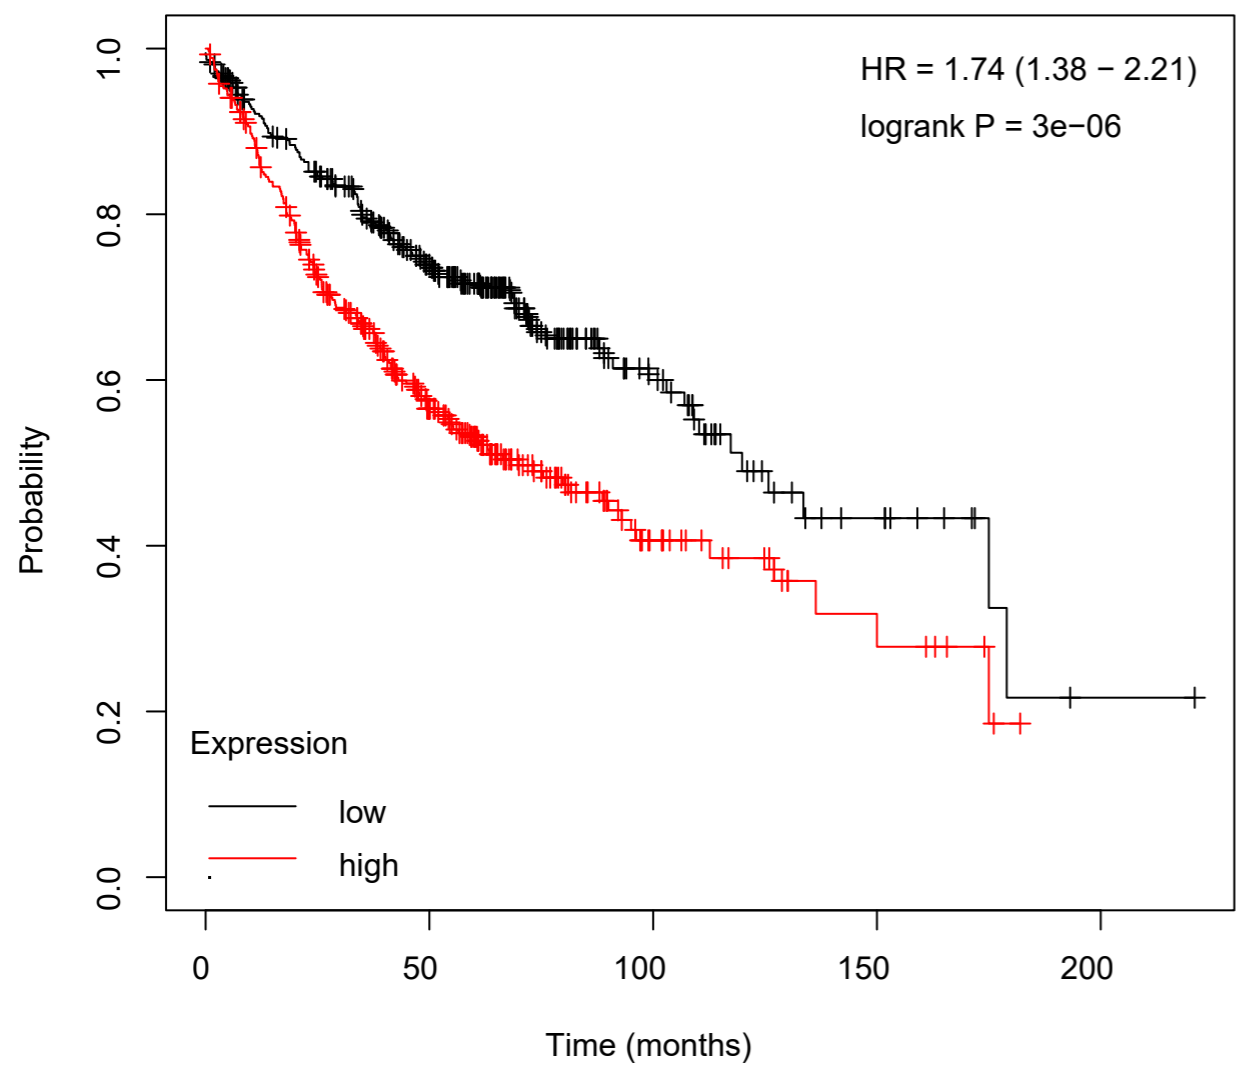

Number at risk

|      |     |     |    |    |   |
|------|-----|-----|----|----|---|
| low  | 365 | 203 | 42 | 11 | 1 |
| high | 354 | 144 | 27 | 8  | 0 |

**B**

KM plot-GSE30219

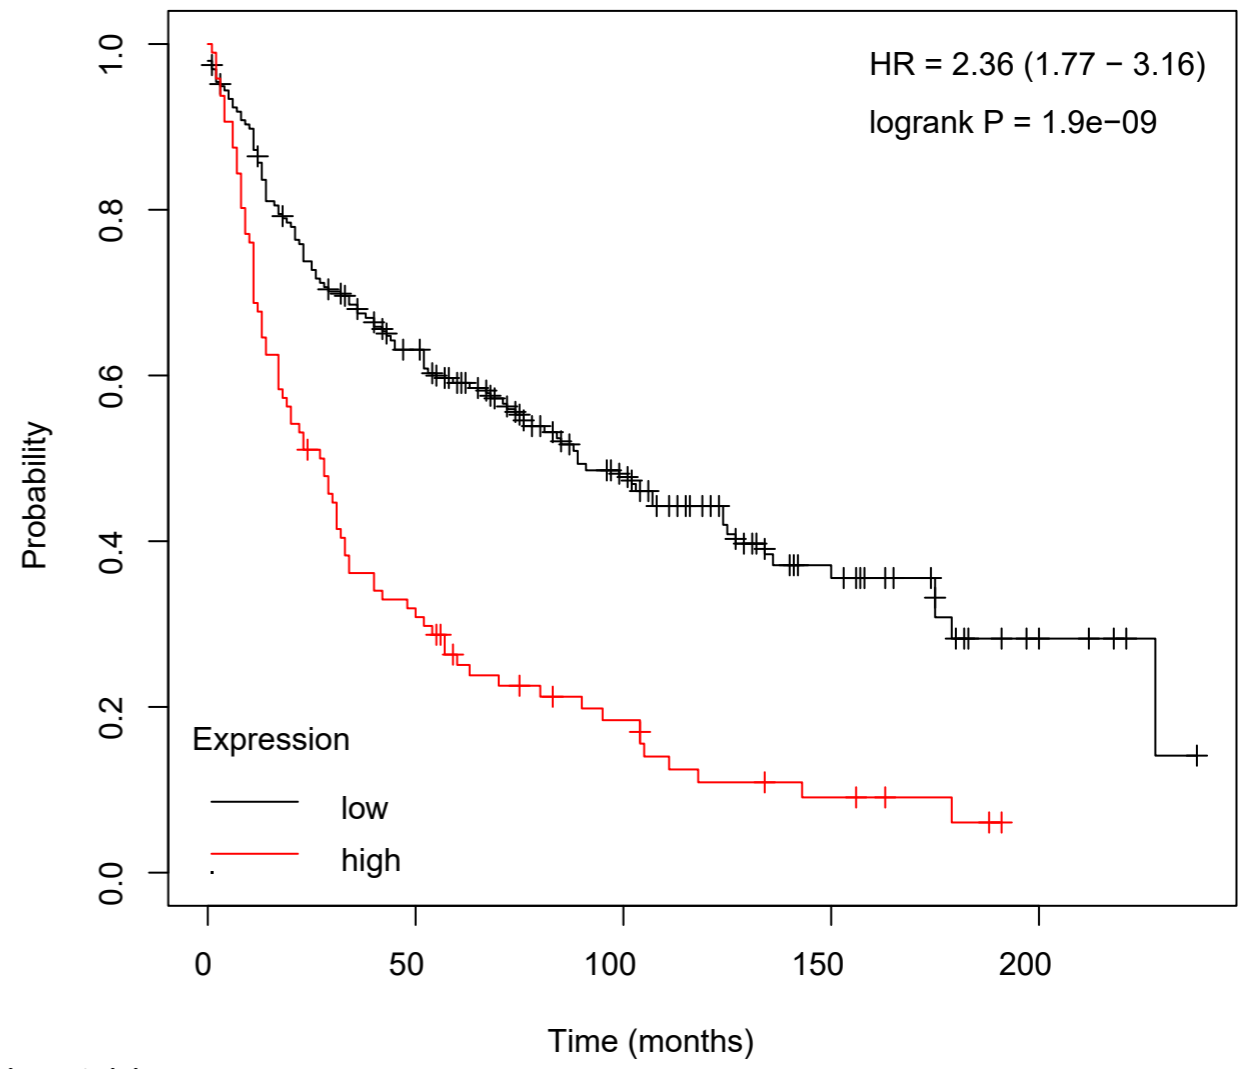

Number at risk

|      |     |     |    |    |   |
|------|-----|-----|----|----|---|
| low  | 197 | 112 | 58 | 24 | 6 |
| high | 96  | 30  | 13 | 5  | 0 |

**C**

KM plot GSE37745

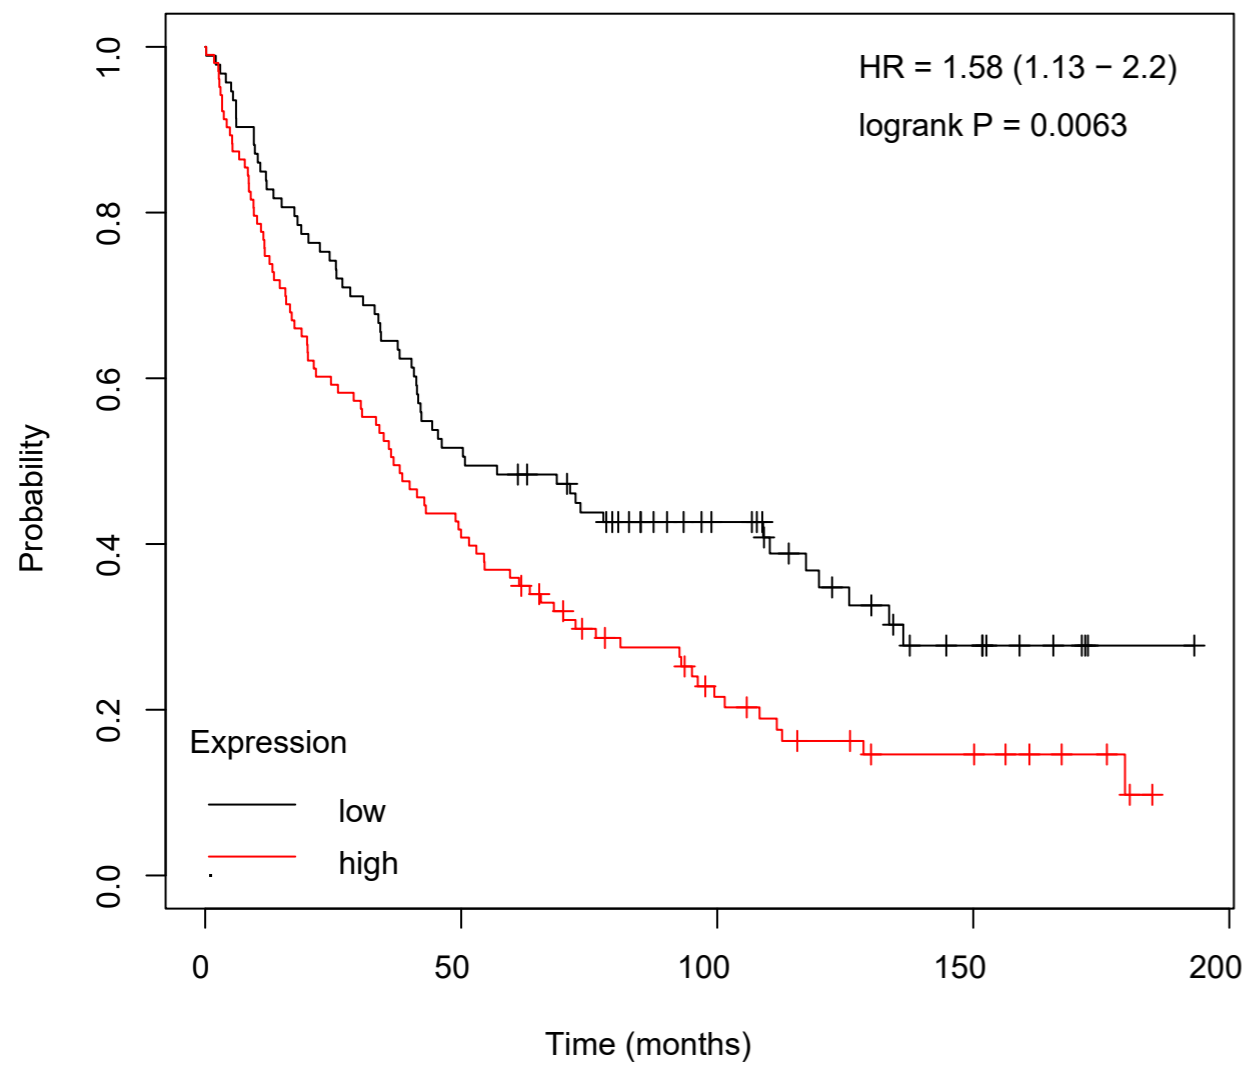

Number at risk

|      |     |    |    |   |   |
|------|-----|----|----|---|---|
| low  | 93  | 48 | 26 | 9 | 0 |
| high | 103 | 42 | 17 | 8 | 0 |

**D**

KM plot-GSE31210

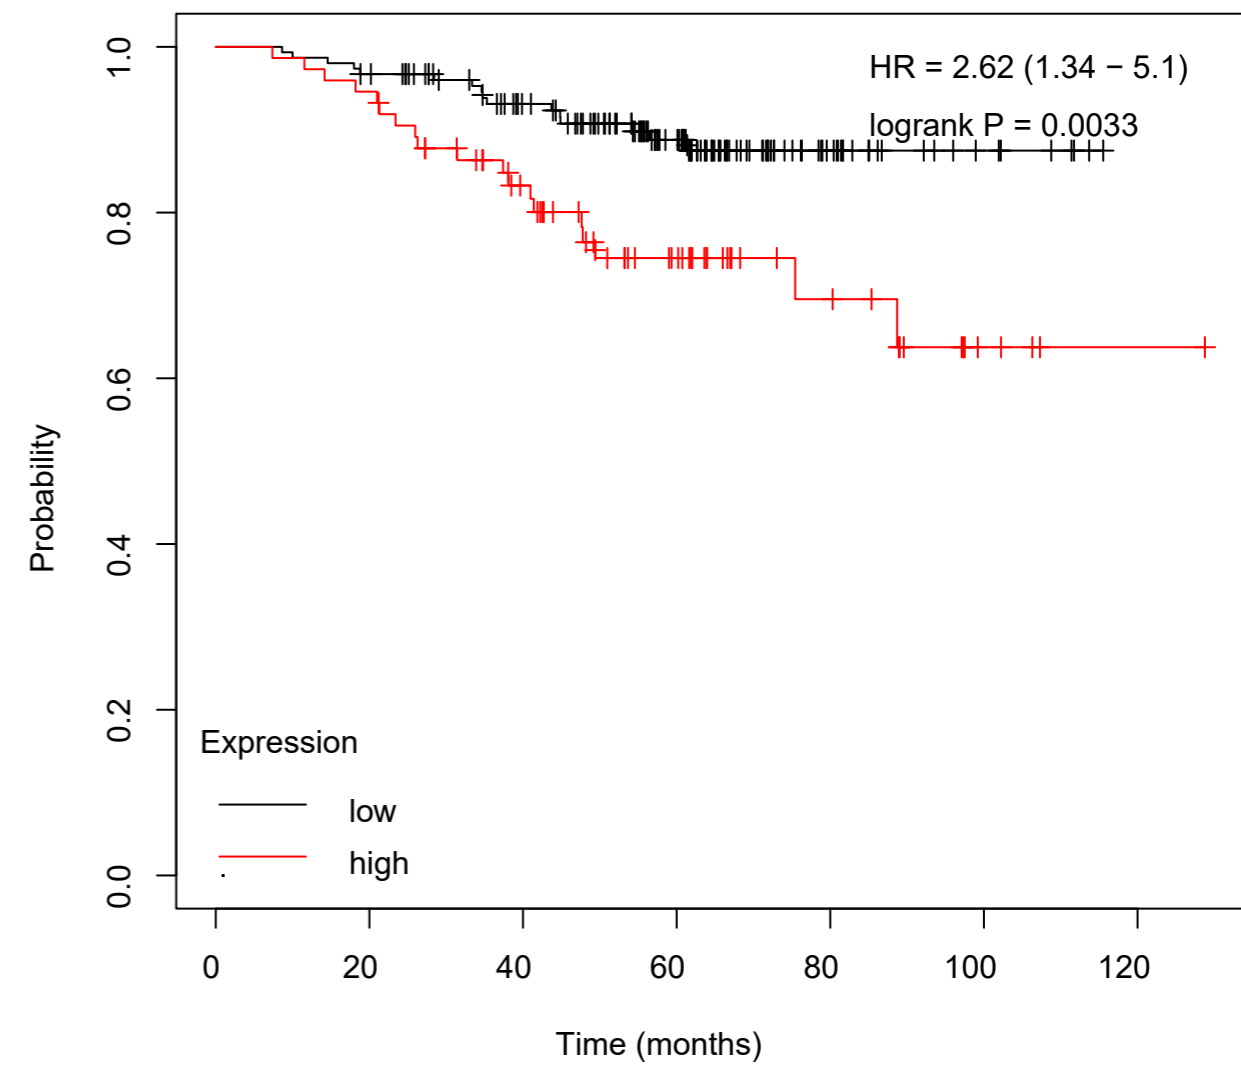

Number at risk

|      |     |     |     |    |    |   |   |
|------|-----|-----|-----|----|----|---|---|
| low  | 152 | 146 | 121 | 79 | 22 | 7 | 0 |
| high | 74  | 70  | 52  | 31 | 14 | 4 | 1 |
