# Supplementary material for: Homologous recombination repair rathway and RAD54L in early-stage lung adenocarcinoma
Source: PeerJ journal article supplement (doi:10.7717/peerj.10680), 2021-02-16

# Overall Survival

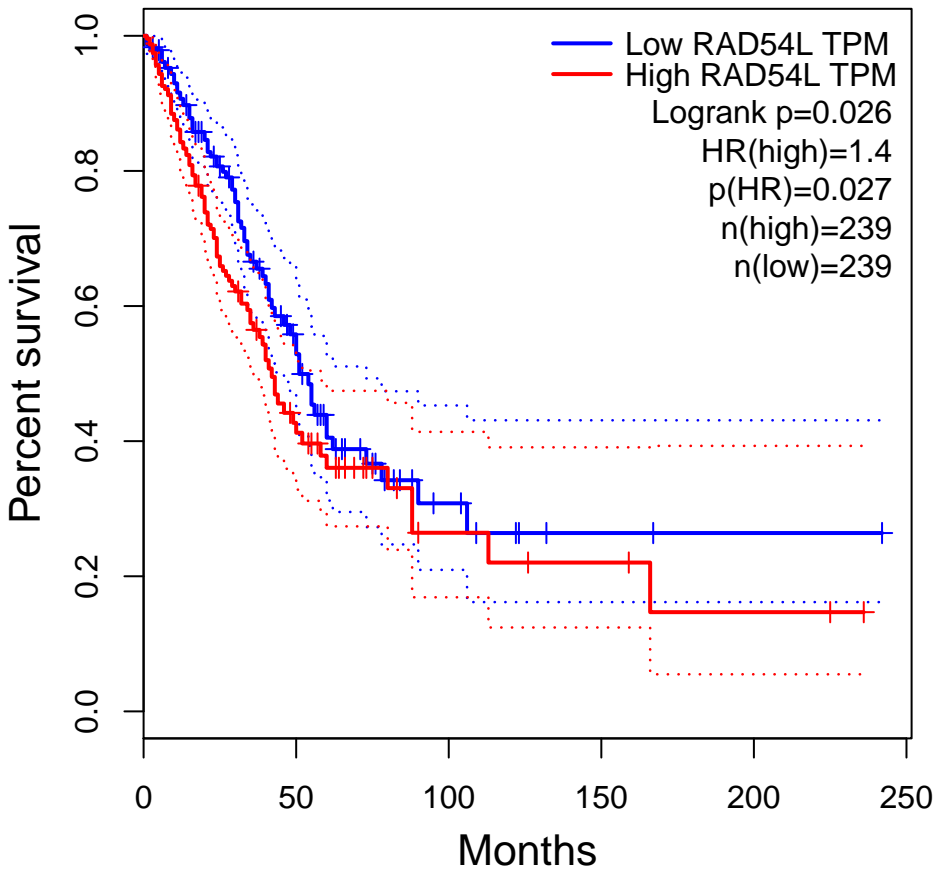

Supplement: supplementary_2.pdf [file supplementary_2.pdf]
